# Supplementary material for: CTHRC1 Induces Pancreatic Stellate Cells (PSCs) into Myofibroblast-like Cancer-Associated Fibroblasts (myCAFs)
Source: MDPI journal article supplement (doi:10.3390/cancers15133370), 2023-06-27
Supplement: s1 [file s1]

**Supplementary Table S1. Primer lists of RT-qPCR**

| Target species | Gene    | Forward primer (5'-3')    | Reverse primer (5'-3')    |
|----------------|---------|---------------------------|---------------------------|
| Homo sapiens   | POLR2A  | TGAAAGTTTTGCGCTGTGTC      | ACCCTCGCATATGTTTTTGC      |
| Homo sapiens   | GAPDH   | CTTTGGTATCGTGGAAGGACTC    | GTAGAGGCAGGGATGATGTTCT    |
| Homo sapiens   | FAP     | GGCTCACGTGGGTACTGAT       | GTCTGCCAGTCTTCCCTGAA      |
| Homo sapiens   | SULF1   | AAGTGACGGGTCTTGGTTG       | GGCAAGGTCAAATGAGGTGT      |
| Homo sapiens   | THBS2   | TATCCCGAGACCAACGAAG       | ACATCATCGTCACTCCCACA      |
| Homo sapiens   | COL5A2  | TGGATTGATCCTAACCAAGGA     | GGTAACTGGATGGGTTTGC       |
| Homo sapiens   | COL10A1 | TGCTGCCACAAATACCCTTT      | TGGGTAGTGGGCCTTTTATG      |
| Homo sapiens   | COL11A1 | TGGAACCTTCCCAGAAGACTTT    | CTCCCAACCTCAACACCAAT      |
| Homo sapiens   | CTSK    | CCGCAGTAATGACACCCTTT      | GCACCCACAGAGCTAAAAGC      |
| Homo sapiens   | LUM     | CCTGGGGCCATTATCCTACT      | CGTTAGCAACACGTAGACATTCA   |
| Homo sapiens   | POSTN   | CGGTCAGTCGGTATCCTGTT      | GTCACCGTCACATCCTATCTCA    |
| Homo sapiens   | COL6A3  | CGAAAGACGAAGGAAGTTGC      | TTGTTTTCGTTTCCACCACA      |
| Homo sapiens   | COL3A1  | GATCAGGCCAGTGGAATGT       | GTGTGTTTCGTGCAACCATC      |
| Homo sapiens   | COL8A1  | GAAAGCCAGGTTTCCTTGGT      | TTCCTGGCTCTCCCTTAGGT      |
| Homo sapiens   | SPARC   | GCTCCACCTGGACTACATCG      | TACAGGGTGACCAGGACGTT      |
| Homo sapiens   | LOX     | ACATTACCACAGTATGGATGAGTTT | TGTGCAGTACATGCAAATCG      |
| Homo sapiens   | MFAP5   | TTGCACCTTCCACAGATGAC      | TGGTGAAGCATAACTGATGAATG   |
| Homo sapiens   | VEGFA   | AGGCCAGCACATAGGAGAGA      | TTTCTTGCGCTTTCGTTTTT      |
| Homo sapiens   | PDGFA   | GGAGTGAGGATTCTTTGGACAC    | GTAAATGACCGTCCTGGTCTTG    |
| Homo sapiens   | EGF     | GCCAAGCAGTCTGTGATTGA      | CTGATGGCATAGCCCAATCT      |
| Homo sapiens   | HGF     | GAGAGTTGGGTCTTACTGCACG    | CTCATCTCCTCTTCCGTGGACA    |
| Homo sapiens   | CTGF    | TGACCTGGAAGAGAACATTAAGAAG | CACAGAATTTAGCTCGGTATGTCTT |
| Homo sapiens   | FGF     | CCGTCAAGGAAATACACCAGTT    | TCAGCTCTTAGCAGACATTGGA    |
| Homo sapiens   | IL1B    | TCTTCTTCGACACATGGGATAAC   | CAGTTCATATGGACCAGACATCA   |
| Homo sapiens   | IL6     | TCTGGATTCAATGAGGAGAC      | GAAGTGGATCAGGACTTTTG      |
| Homo sapiens   | IL8     | GAGAGTGATTGAGAGTGGACCAC   | CACAACCCTCTGCACCCAGTTT    |
| Homo sapiens   | IL10    | GATTTCTTCCCTGTGAAAACAAGAG | CTTTAGCTTCGGGTCAATGC      |
| Homo sapiens   | TGFB1   | AGCTGTACCAGAAATACAGCAACA  | ACTCCGGTGACATCAAAAGATAAC  |
| Homo sapiens   | CXCL12  | AGAGCCAACGTCAAGCATCT      | CTTTAGCTTCGGGTCAATGC      |

|              |         |                         |                         |
|--------------|---------|-------------------------|-------------------------|
| Homo sapiens | GM-CSF  | ACATGGTTTGACTCCCGAAC    | GCCTGGCCCTAAAAAGAGTC    |
| Homo sapiens | FGFR    | GAACAGGCATGCAAGTGAGA    | ACGAAGCACTGACCTCCCTA    |
| Homo sapiens | ACTA2   | TCCCTTGAGAAGAGTTACGA    | GATGCTGTTGTAGGTGGTTT    |
| Homo sapiens | THY1    | GAAGGTCCTCTACTTATCCGCC  | TGATGCCCTCACACTTGACCAG  |
| Homo sapiens | TAGLN   | TCCAGGTCTGGCTGAAGAAT    | GCTCCATCTGCTTGAAGACC    |
| Homo sapiens | CLEC3B  | AGCTCAAGAGCCGTCTGGACAC  | GGAAGGTCTTCGTCTGGGTGAA  |
| Homo sapiens | COL14A1 | GTGTCCGAGGAATGGTATAA    | AGGATGGTGTTAATGTCAGC    |
| Homo sapiens | CD74    | AAGCCTGTGAGCAAGATGCGCA  | AGCAGGTGCATCACATGGTCCT  |
| Homo sapiens | SLPI    | AGCGTGACTTGAAGTGTTCATG  | GAAAGGACCTGGACCACACAGA  |
| Mus musculus | ACTA2   | TGCTGACAGAGGCACCACTGAA  | CAGTTGTACGTCCAGAGGCATAG |
| Mus musculus | THY1    | CCTTACCCTAGCCAACTTCACC  | TTATGCCGCCACACTTGACCAG  |
| Mus musculus | TAGLN   | GCAGATGGAACAGGTGGCTCAA  | CCCAAAGCCATTAGAGTCCTCTG |
| Mus musculus | CLEC3B  | CGAGGAACTCAAGAACAGGATGG | GCCTCATGGAAGGTCTTCGGTT  |
| Mus musculus | COL14A1 | GTCAGGCTTCAGTGATGCTCTG  | ATTTGCCACCGAGCACACAAGC  |
| Mus musculus | IL6     | TACCACTTCACAAGTCGGAGGC  | CTGCAAGTGCATCATCGTTGTTC |
| Mus musculus | CD74    | GCTGGATGAAGCAGTGGCTCTT  | GATGTGGCTGACTTCTTCCTGG  |
| Mus musculus | SLPI    | AAGCAGAGGTGCTGCCAAGATG  | TCTGGCAGACATTGGGAGGGTT  |
| Mus musculus | GM-CSF  | GAGCAGTTGTGTGCCACCTA    | AGCTGGCTTAGGCACTGTGT    |
| Mus musculus | TGFB    | TGCCCTCTACAACCAACACA    | GTTGGACAACTGCTCCACCT    |
| Mus musculus | IL1B    | GCTGCTTCCAAACCTTTGAC    | AGCTTCTCCACAGCCACAAT    |
| Mus musculus | FGFR    | GAGACAGACTGGTCTTAGGCAAA | CCAATCATTTTCATCATCTCCAT |

**Supplementary Table S2. Information of datasets included for comparison of CTHRC1 mRNA expression between paired tumor/normal, and between paired cancer/stroma samples.**

| Series Accession | Publication Year | Title                                                                                                                                                                            | Country | Diagnosis                              | Sample Type            | Number   | mRNA Expression Platform                                       | Publication PMID             |
|------------------|------------------|----------------------------------------------------------------------------------------------------------------------------------------------------------------------------------|---------|----------------------------------------|------------------------|----------|----------------------------------------------------------------|------------------------------|
| GSE62452         | 2016             | Microarray gene-expression profiles of 69 pancreatic tumors and 61 adjacent non-tumor tissue from patients with pancreatic ductal adenocarcinoma                                 | USA     | Pancreatic ductal adenocarcinoma       | Paired tumor/normal    | 60/60    | Affymetrix Human Gene 1.0 ST Array [transcript (gene) version] | 27197190                     |
|                  |                  |                                                                                                                                                                                  |         |                                        | Unpaired tumor/normal  | 9/1      |                                                                |                              |
| GSE183795        | 2022             | Microarray gene-expression profiles of 139 pancreatic tumor,102 adjacent non-tumor tissue from patients with pancreatic ductal adenocarcinoma and 3 normal pancreas from donors. | USA     | Pancreatic ductal adenocarcinoma       | Paired tumor/normal    | 100/100# | Affymetrix Human Gene 1.0 ST Array                             | 36426859                     |
|                  |                  |                                                                                                                                                                                  |         |                                        | Unpaired tumor/normal/ | 39/2     |                                                                |                              |
|                  |                  |                                                                                                                                                                                  |         |                                        | Unclassified           | 3        |                                                                |                              |
| GSE15471         | 2009             | Whole-Tissue Gene Expression Study of Pancreatic Ductal Adenocarcinoma                                                                                                           | Romania | Pancreatic ductal adenocarcinoma       | Paired tumor/normal    | 36/36&   | Affymetrix U133 Plus 2.0 whole-genome chips                    | 19260470, 28881803           |
|                  |                  |                                                                                                                                                                                  |         |                                        | Unpaired tumor/normal  | 0/0      |                                                                |                              |
| GSE16515         | 2009             | Expression data from Mayo Clinic Pancreatic Tumor and Normal samples                                                                                                             | USA     | Pancreatic ductal adenocarcinoma       | Paired tumor/normal    | 16/16    | Affymetrix Human Genome U133 Plus 2.0 Array                    | 19732725, 27749787, 23936393 |
|                  |                  |                                                                                                                                                                                  |         |                                        | Unpaired tumor/normal  | 20/0     |                                                                |                              |
| GSE93326         | 2018             | Gene expression from laser capture microdissected pancreatic cancer epithelium and stroma                                                                                        | Germany | Pancreatic ductal adenocarcinoma       | Paired tumor /stroma   | 66/66    | Nugen Ovation RNA-Seq System V2                                | 30658994, 29249692, 29440233 |
|                  |                  |                                                                                                                                                                                  |         |                                        | Unpaired tumor /stroma | 0/57     |                                                                |                              |
| GSE164665        | 2021             | Transcriptomic Analysis of Laser Capture Microdissected Tumors of Pancreatic Ductal Adenocarcinoma                                                                               | USA     | Pancreatic ductal adenocarcinoma (All) | Paired cancer/stroma   | 19/19    | Illumina NextSeq 500 (Homo sapiens)                            | -                            |
|                  |                  |                                                                                                                                                                                  |         |                                        | Unpaired cancer/stroma | 0/0      |                                                                |                              |

**# 80 (40/40) paired tumor/normal samples were excluded from study due to sample overlapping with GSE62452.**

**& Three samples were tested in duplicates, resulting in 78 (39/39) paired tumor/normal data.**

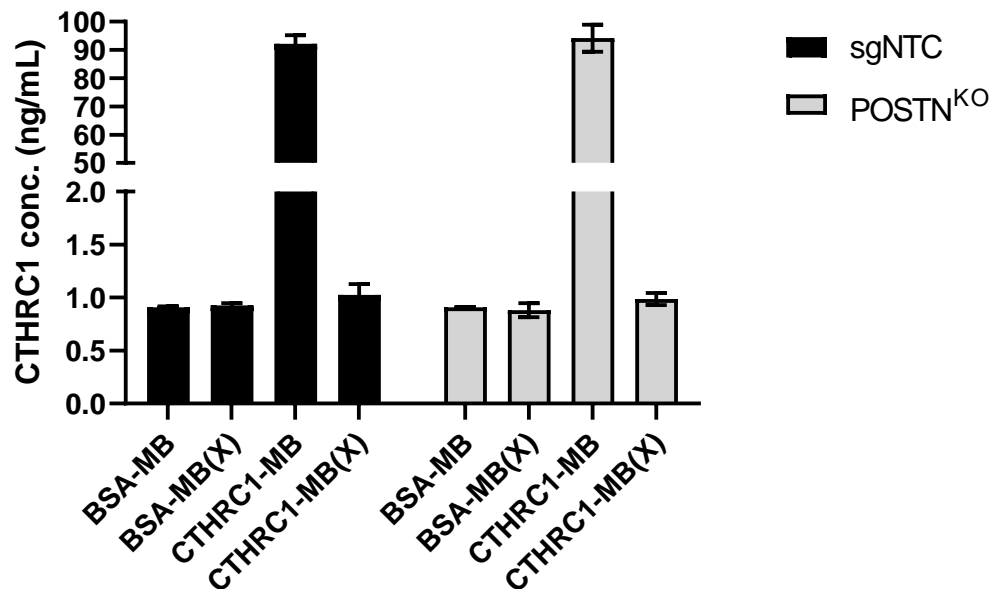

**Supplementary Figure S1. CTHRC1 concentration in pancreatic stellate cell (PSC) conditioned media, determined by sandwich ELISA.**

BSA-MB/CTHRC1-MB: Conditioned media of PSC with or without POSTN-knockout (sgNTE and PONTN<sup>KO</sup>, respectively) treated by magnetic bead (MB)-conjugated BSA or CTHRC1.

BSA-MB(X)/CTHRC1-MB(X): Conditioned media of PSC with or without POSTN-knockout (sgNTE and PONTN<sup>KO</sup>, respectively) treated by magnetic bead (MB)-conjugated BSA or CTHRC1, harvested after BSA and CTHRC1 removed by a magnetic stand.

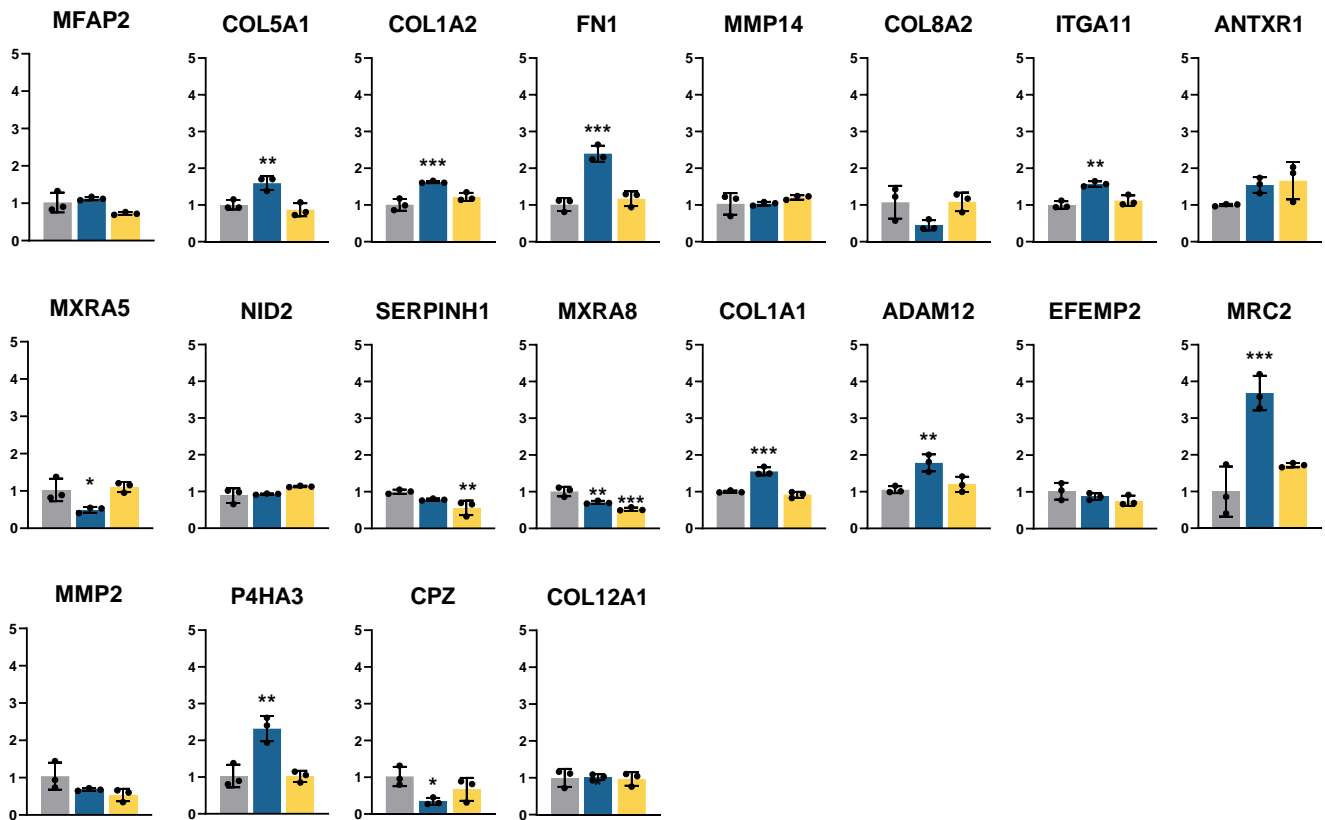

### Supplementary Figure S2. Extracellular matrix (ECM)-related genes not upregulated by CTHRC1 in pancreatic stellate cells (PSC).

The expression of 35 ECM-related genes that showed high correlation with CTHRC1 ( $r > 0.8$ ) was measured after PSC were treated with PBS, TGF- $\beta$  (2.1 nM), or CTHRC1 (1.7 nM) for 24 hours. Except 15 genes that significantly showed upregulation, 18 of the 35 ECM-related genes did not show a significant change in expression, and two genes (SERPINH1 and MXRA8) showed a significantly reduced expression.

Figure 3A

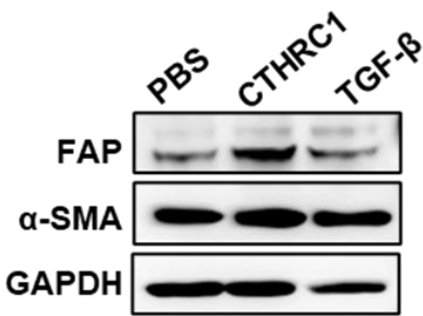

GAPDH

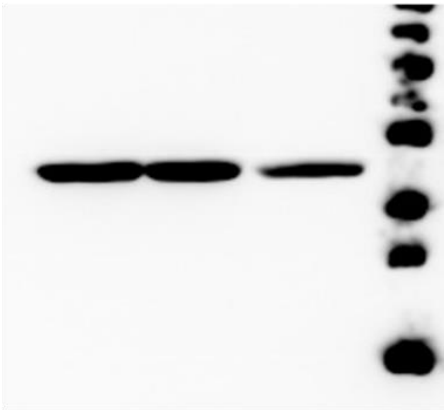

$\alpha$ -SMA

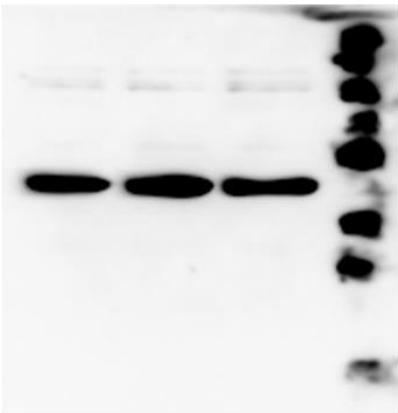

FAP

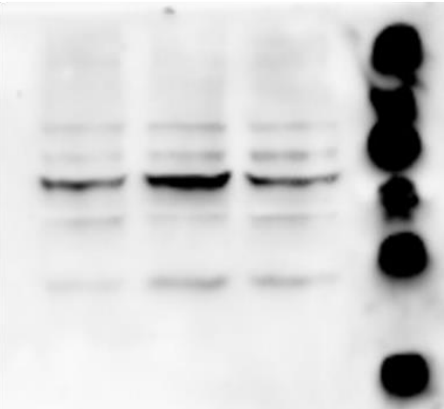

**Figure 6B**

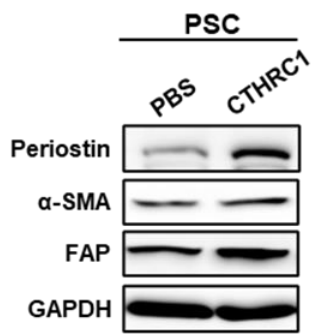

**GAPDH**

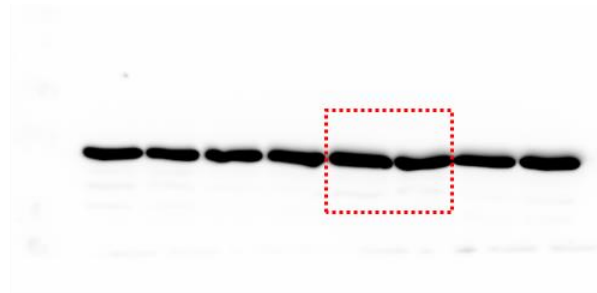

**FAP**

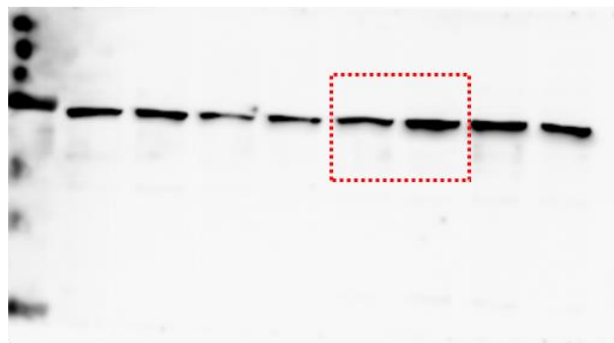

**$\alpha$ -SMA**

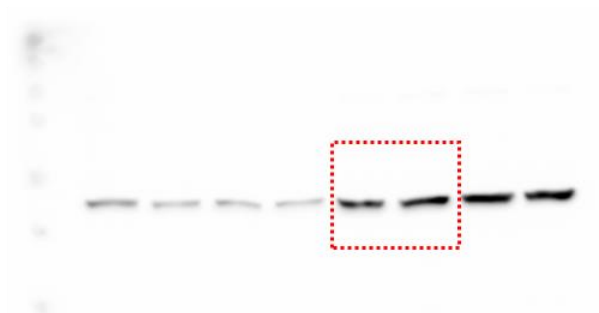

**Periostin**

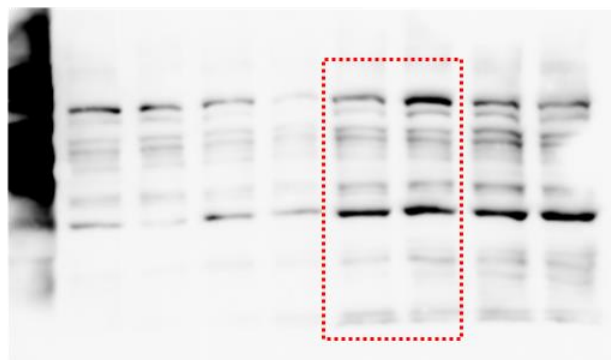

**Supplementary Figure S3. Uncropped images of western blot membranes shown in Figure 3A and Figure 6B.**

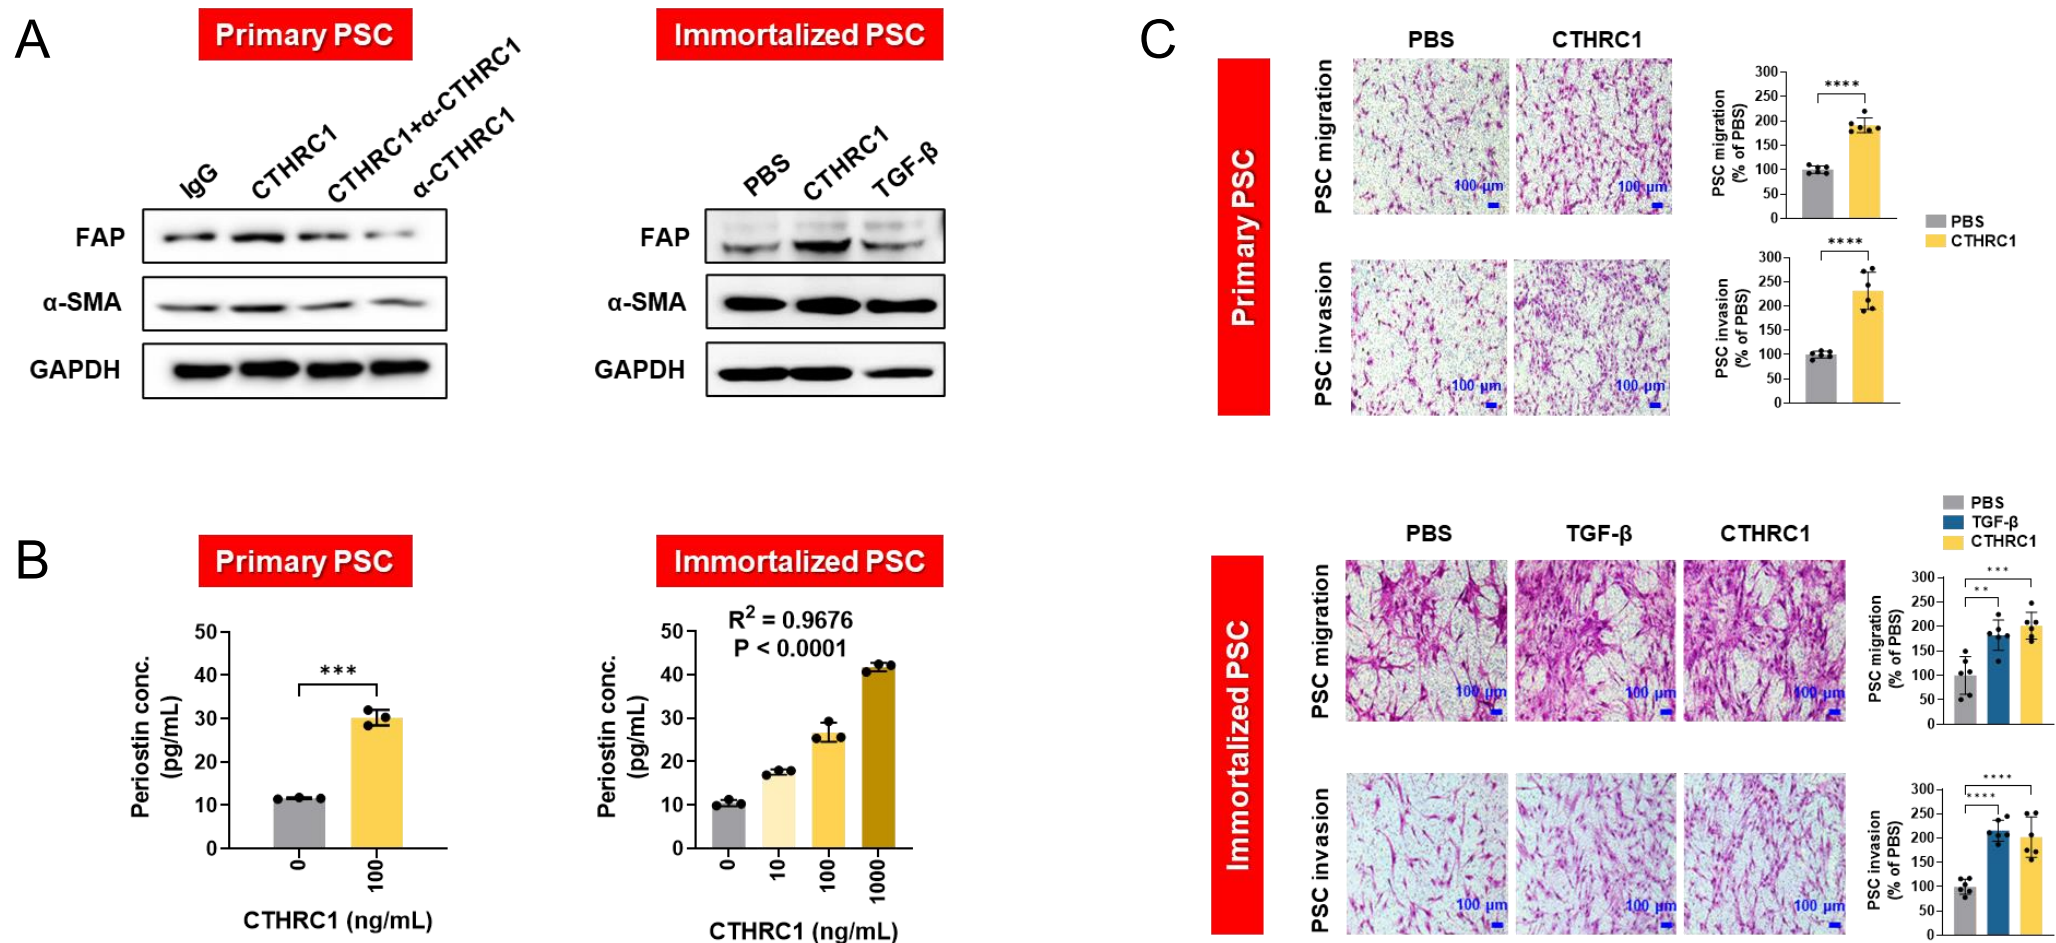

**Supplementary Figure S4. In vitro studies conducted using primary pancreatic stellate cells (PSC) and immortalized PSC generated similar results.**

(A) Activation of primary PSC and immortalized PSC after treatments with: (primary PSC) IgG, CTHRC1 (1.7 nM), CTHRC1+αCTHRC1 (anti-CTHRC1 mAb, 69.4 nM), or αCTHRC1, (immortalized PSC) PBS, CTHRC1 (1.7 nM), or TGF-β (2.1 nM) for 24 hours, demonstrated by protein expression of FAP and α-SMA using Western blot. (B) Concentration of periostin in primary PSC and immortalized PSC after treatment with: (primary PSC) 0 and 100 ng/mL CTHRC1, (immortalized PSC) 0, 10, 100, and 1000 ng/mL CTHRC1 for 24 hours, determined by sandwich ELISA. (C) Activation of metastatic capacity of primary PSC and immortalized PSC by the treatment of PBS, CTHRC1 (1.7 nM), or TGF-β (2.1 nM, only for immortalized PSC) for 24 hours.



**PBS**

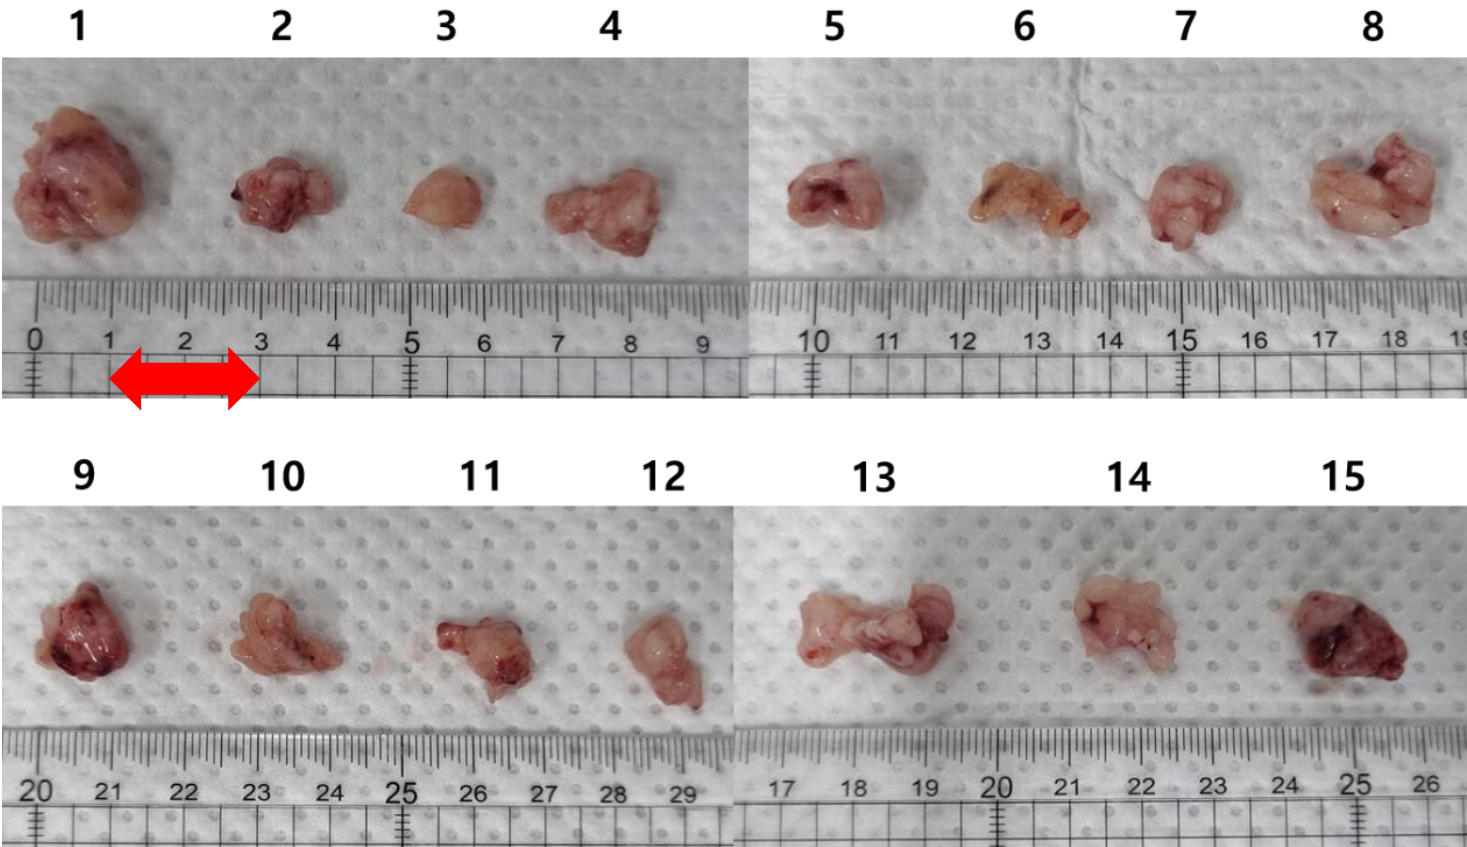

**Gemcitabine**

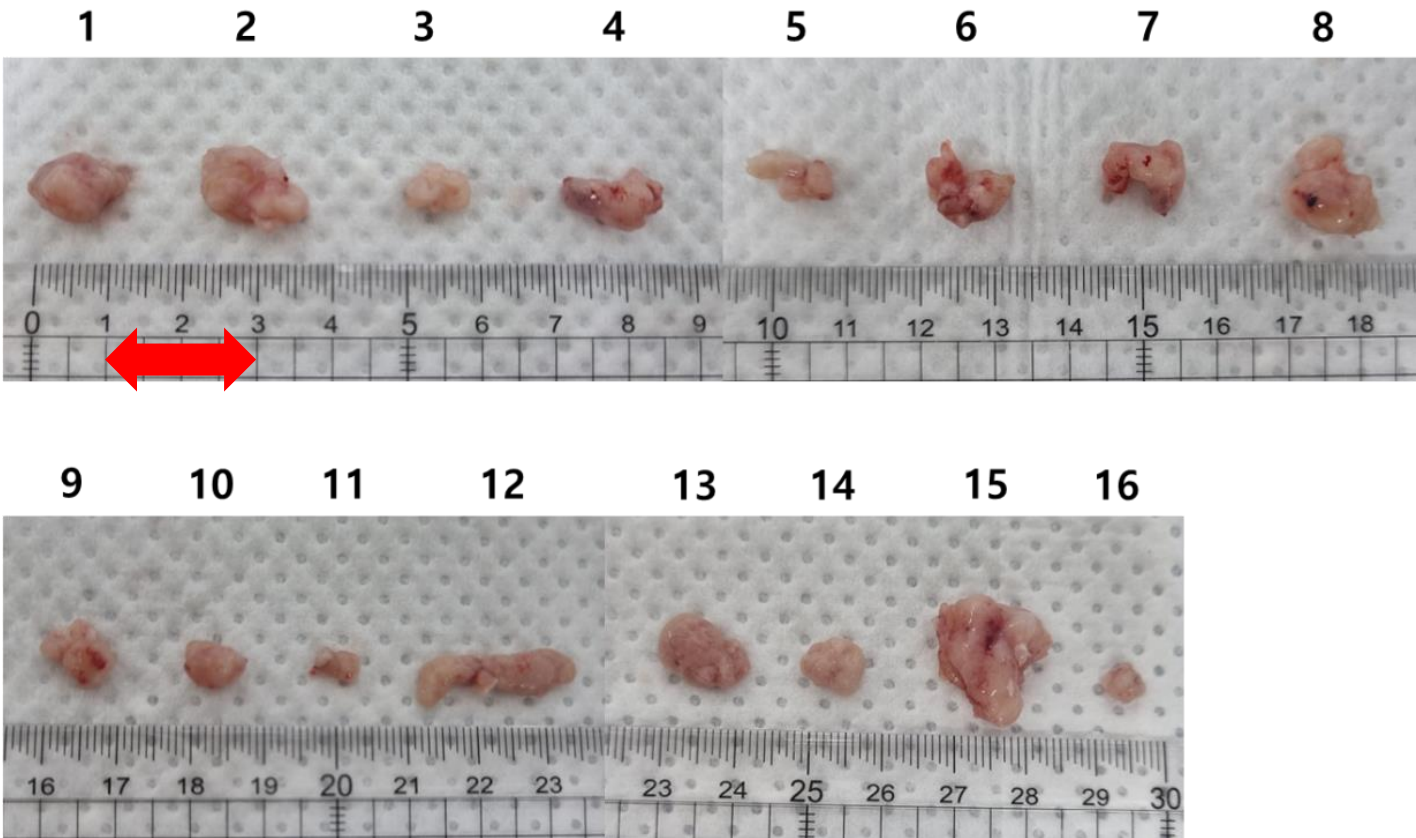

## $\alpha$ -CTHRC1

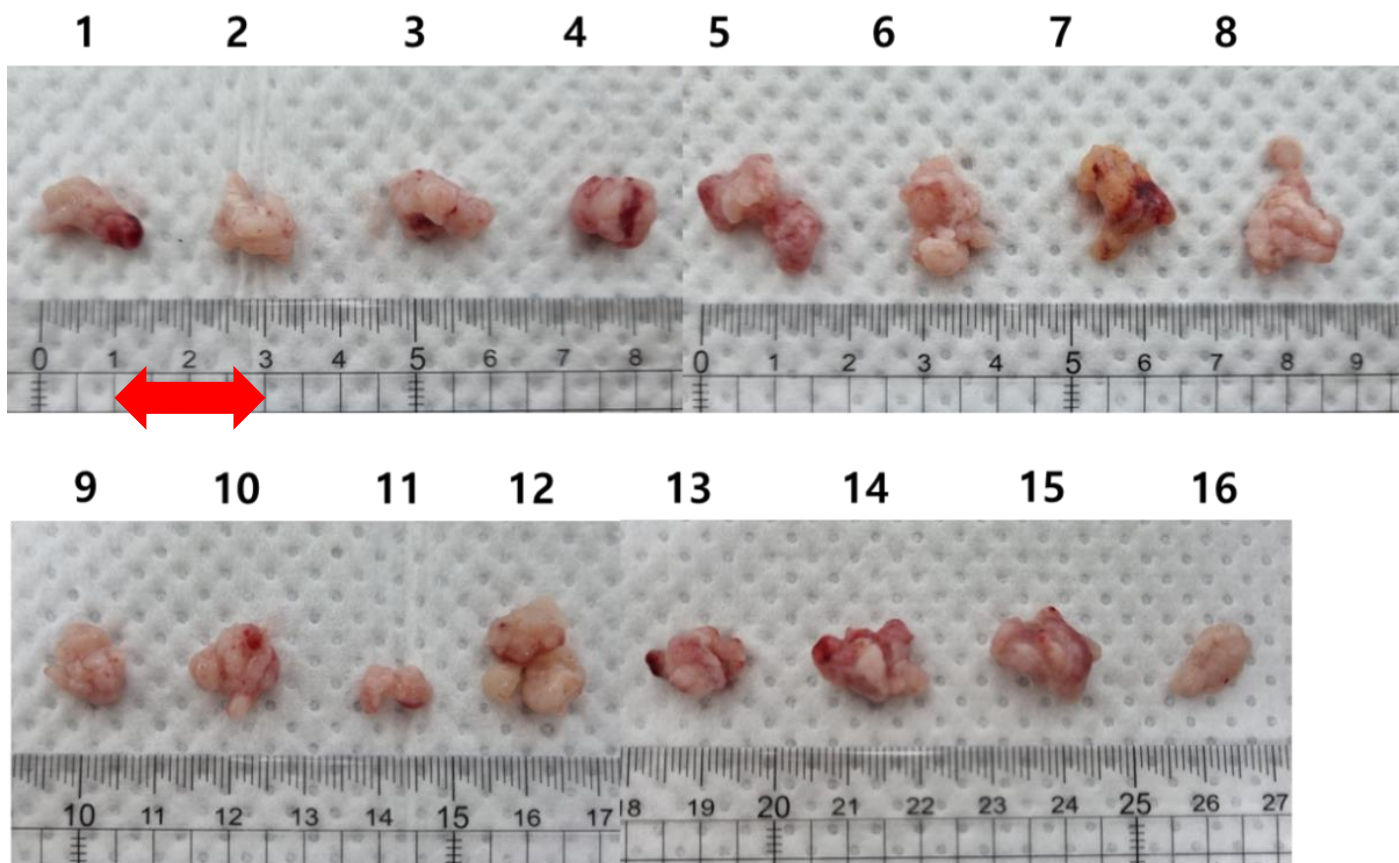

## Gem + $\alpha$ -CTHRC1

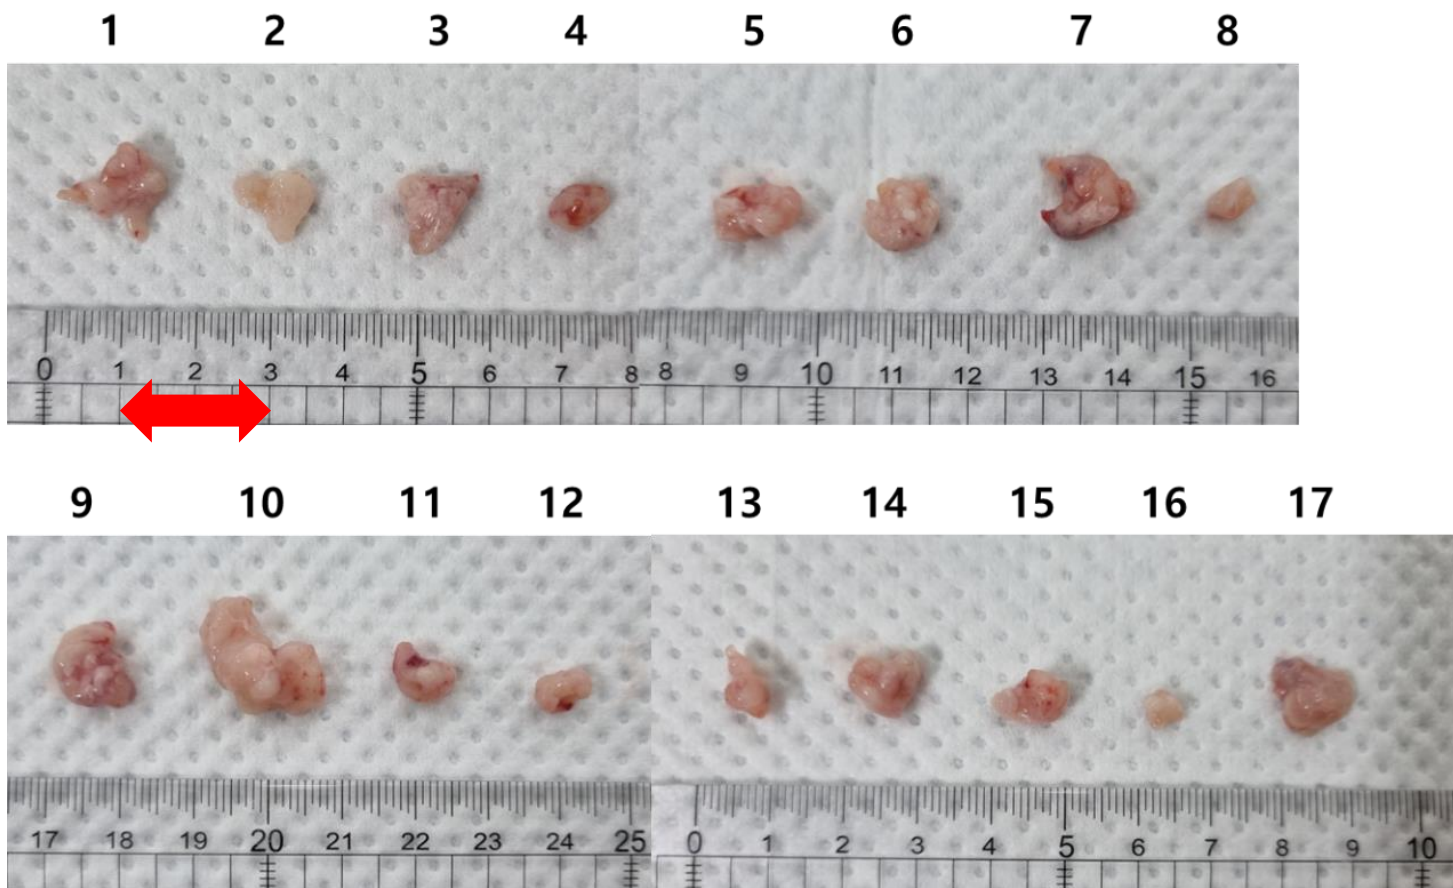

**Supplementary Figure S5. Tumor images of CFPAC-1 orthotopic mouse model.**

Tumor images were obtained after the sacrifice of the animals in the CFPAC-1 orthotopic mouse model. Red arrows (2 cm) are used to scale the images to 100% of the actual size.
